# Supplementary material for: An ultra-highly active Ir–Ru–B/CeO2 catalyst for hydrogen generation from hydrazine monohydrate
Source: Royal Society of Chemistry journal article supplement (doi:10.1039/d1ta05952a), 2021-01-01
Supplement: d1ta05952a1.pdf [file d1ta05952a1.pdf]

## Supplementary Information

### **Ultra-highly active Ir-Ru-B/CeO<sub>2</sub> catalyst for hydrogen generation from hydrazine monohydrate**

Yu-Ping Qiu<sup>a</sup>, Wei-Zhen Wang<sup>b</sup>, Mu-Hua Chen<sup>a</sup>, Qing Shi<sup>a</sup>, Zhi-Qing Yang<sup>b</sup>, Ping Wang<sup>a\*</sup>

<sup>a</sup>School of Materials Science and Engineering, South China University of Technology, Guangzhou 510641, P.R. China

<sup>b</sup>Shenyang National Laboratory for Materials Science, Institute of Metal Research, Chinese Academy of Sciences, Shenyang 110016, P.R. China

\*Corresponding author. Tel: +86 20 3938 0583; e-mail: mspwang@scut.edu.cn (P. Wang)

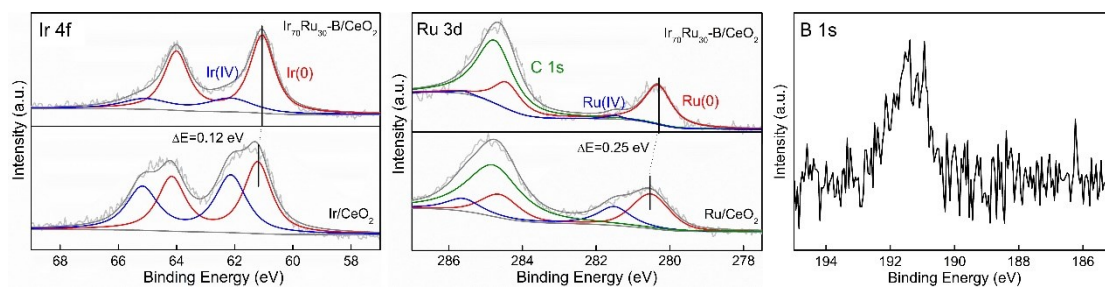

**Figure S1.** A comparison of XPS spectra of the  $\text{Ir}_{70}\text{Ru}_{30}\text{-B/CeO}_2$  catalyst and the relevant  $\text{Ir/CeO}_2$  and  $\text{Ru/CeO}_2$  reference samples in the Ir 4f, Ru 3d and B 1s regions.

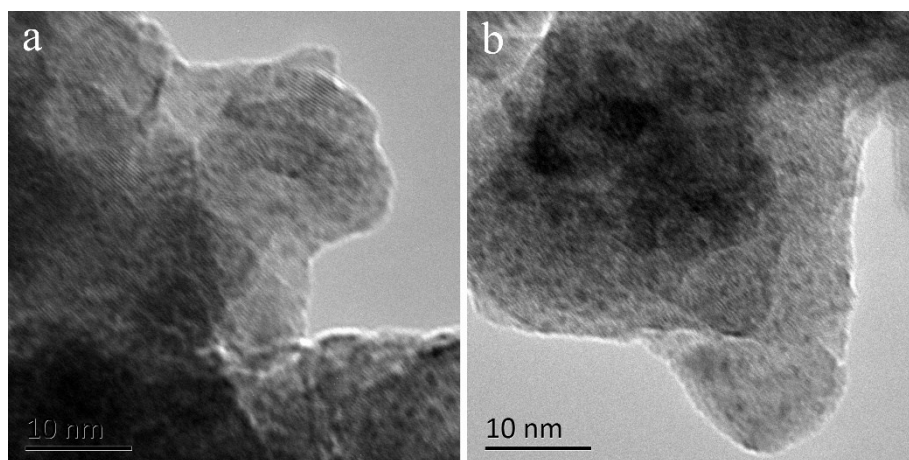

**Figure S2.** Representative TEM images of the  $\text{Ir}_{70}\text{Ru}_{30}\text{-B/CeO}_2$  sample at different states: (a) as-prepared; (b) post-annealed at 600 °C.

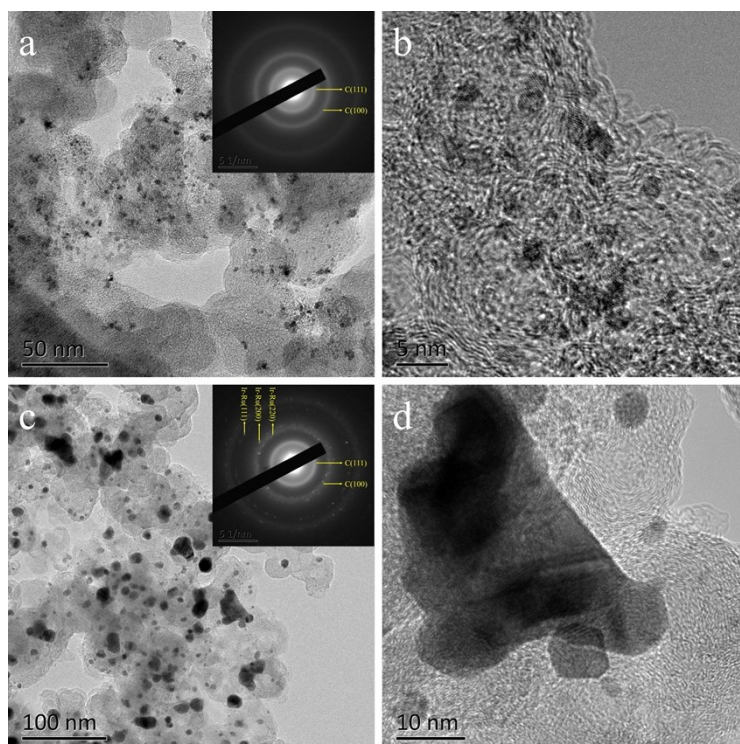

**Figure S3.** Representative TEM images of the Ir<sub>70</sub>Ru<sub>30</sub>-B/C sample at different states: (a, b) as-prepared; (c, d) post-annealed at 600 °C. The insets in (a) and (c) show the corresponding SAED patterns, respectively. The loading amount of metal was 30.0 wt% with a comparable loading density to that of Ir<sub>70</sub>Ru<sub>30</sub>-B/CeO<sub>2</sub> sample.

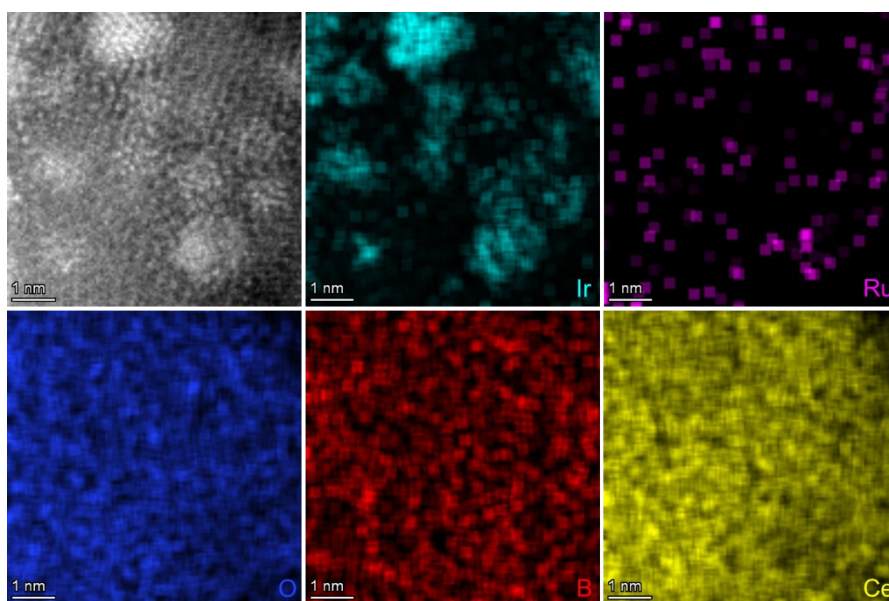

**Figure S4.** Atomic resolution HAADF-STEM image and corresponding EDS elemental mapping results of the as-prepared Ir<sub>70</sub>Ru<sub>30</sub>-B/CeO<sub>2</sub> catalyst.

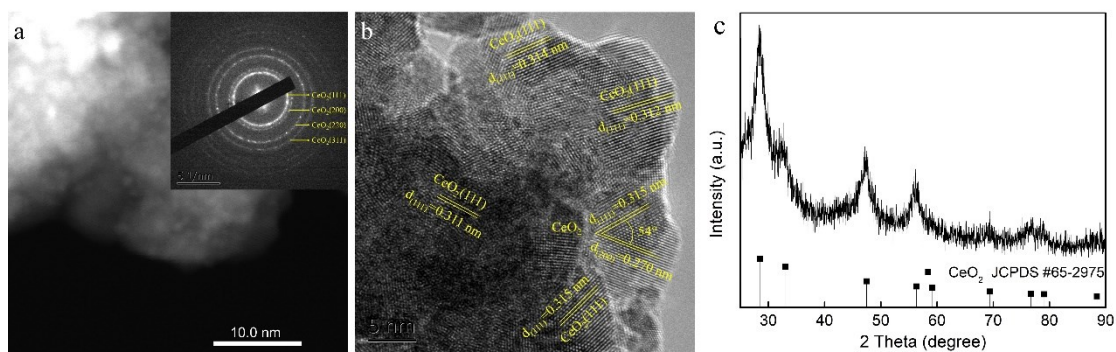

**Figure S5.** (a) HAADF-STEM image, (b) HRTEM image and (c) XRD pattern of the post-used Ir<sub>70</sub>Ru<sub>30</sub>-B/CeO<sub>2</sub> catalyst after ten cyclic usage. The inset in (a) shows the SAED pattern.

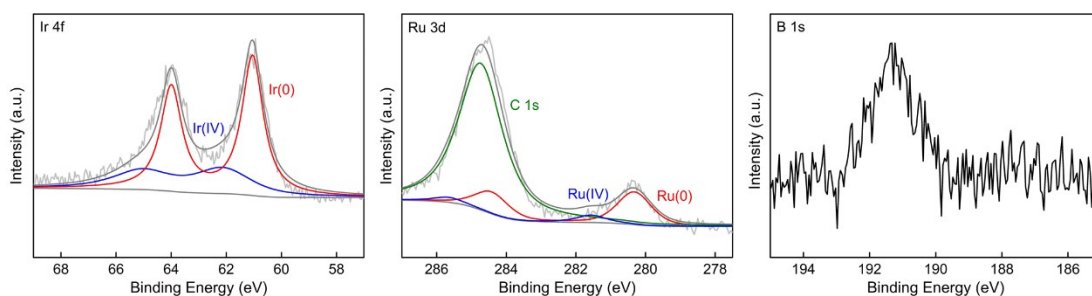

**Figure S6.** XPS spectra of post-used Ir<sub>70</sub>Ru<sub>30</sub>-B/CeO<sub>2</sub> catalyst after ten cyclic usage in the Ir 4f, Ru 3d and B 1s regions.

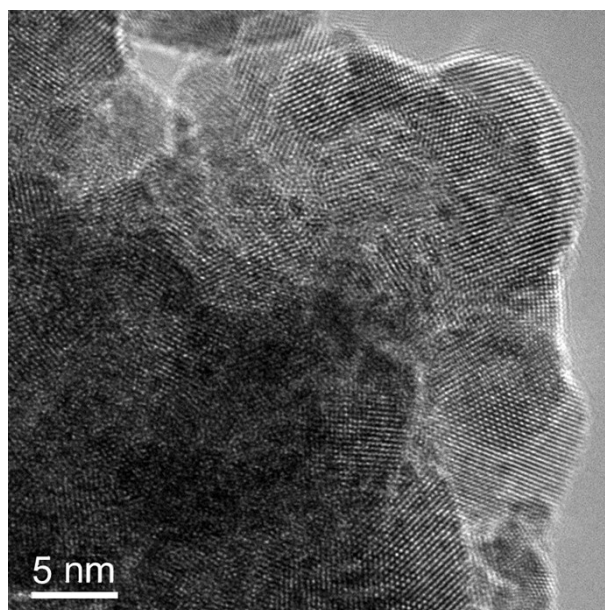

**Figure S7.** A representative TEM image of the Ir<sub>70</sub>Ru<sub>30</sub>/CeO<sub>2</sub> reference sample.

**Table S1.** A comparison of catalytic performance of the 600 °C-annealed Ir<sub>70</sub>Ru<sub>30</sub>-B/CeO<sub>2</sub> and representative N<sub>2</sub>H<sub>4</sub>·H<sub>2</sub>O decomposition catalysts from open literatures.

| Catalyst                                                                              | Temperature (°C) | Reaction rate (h <sup>-1</sup> ) | H <sub>2</sub> selectivity (%) | NaOH concentration (M) | E <sub>a</sub> (kJ mol <sup>-1</sup> ) | Ref.      |
|---------------------------------------------------------------------------------------|------------------|----------------------------------|--------------------------------|------------------------|----------------------------------------|-----------|
| Rh <sub>0.8</sub> Ni <sub>0.2</sub> /MIL-101                                          | 50               | 428.6                            | 100                            | 0.5                    | 49.8                                   | 1         |
| Ni <sub>60</sub> Pt <sub>40</sub> /NC                                                 | 50               | 1602                             | 100                            | 2.0                    | 48.3                                   | 2         |
| NiPt <sub>0.057</sub> /Al <sub>2</sub> O <sub>3</sub>                                 | 30               | 16.5                             | 97                             | 0                      | 34.0                                   | 3         |
| CoPt/La(OH) <sub>3</sub>                                                              | 50               | 2400                             | 100                            | 3.5                    | 45.2                                   | 4         |
| Rh <sub>47</sub> Ni <sub>18</sub> P <sub>35</sub> @MOF-74                             | 50               | 715.4                            | 100                            | 2                      | 49.39                                  | 5         |
| Ni <sub>0.6</sub> Pt <sub>0.4</sub> /g-C <sub>3</sub> N <sub>4</sub>                  | 50               | 2194                             | 100                            | 0.75                   | 35.9                                   | 6         |
| Pt <sub>0.5</sub> Ni <sub>0.5</sub> /NGNs-850                                         | 50               | 2116                             | 100                            | 1                      | 32.28                                  | 7         |
| Rh <sub>58</sub> Ni <sub>42</sub> @MIL-101                                            | 50               | 344                              | 100                            | 0.5                    | 33                                     | 8         |
| NiFe/CeZrO <sub>2</sub>                                                               | 70               | 119.2                            | 100                            | 2.5                    | 50.4                                   | 9         |
| Ni <sub>10</sub> Mo/Ni-Mo-O                                                           | 50               | 54.5                             | 100                            | 2                      | 55                                     | 10        |
| Ni-CeO <sub>2</sub> @SiO <sub>2</sub>                                                 | 70               | 219.5                            | 100                            | 2                      | 59.26                                  | 11        |
| Ni <sub>0.75</sub> Ir <sub>0.25</sub> /La <sub>2</sub> O <sub>2</sub> CO <sub>3</sub> | 50               | 330                              | 100                            | 1.2                    | 65.5                                   | 12        |
| Ir <sub>70</sub> Ru <sub>30</sub> -B/CeO <sub>2</sub>                                 | 50               | 11510                            | 86                             | 2                      | 41.2                                   | This work |

**Table S2.** Surface Ir/Ru atomic ratio of the Ir<sub>70</sub>Ru<sub>30</sub>-B/CeO<sub>2</sub> catalysts as determined by XPS analyses.

| Sample                                                                          | Ir/Ru ratio |
|---------------------------------------------------------------------------------|-------------|
| Ir <sub>70</sub> Ru <sub>30</sub> -B/CeO <sub>2</sub> (as-prepared)             | 2.58        |
| Ir <sub>70</sub> Ru <sub>30</sub> -B/CeO <sub>2</sub> (post-annealed at 600 °C) | 2.60        |
| Ir <sub>70</sub> Ru <sub>30</sub> -B/CeO <sub>2</sub> (post-used)               | 2.63        |

## References

1. Z. Zhang, S. Zhang, Q. Yao, G. Feng, M. Zhu, Z.H. Lu, Metal-organic framework immobilized RhNi alloy nanoparticles for complete H<sub>2</sub> evolution from hydrazine borane and hydrous hydrazine, *Inorg. Chem. Front.* 5(2018) 370–377.
2. Y.P. Qiu, Q. Shi, L.L. Zhou, M.H. Chen, C. Chen, P.P. Tang, G.S. Walker, P. Wang, NiPt nanoparticles anchored onto hierarchical nanoporous N-doped carbon as an efficient catalyst for hydrogen generation from hydrazine monohydrate, *ACS Appl. Mater. Interfaces* 12(2020) 18617–18624.
3. L. He, Y. Huang, A. Wang, Y. Liu, X. Liu, X. Chen, J.J. Delgado, X. Wang, T. Zhang, Surface modification of Ni/Al<sub>2</sub>O<sub>3</sub> with Pt: highly efficient catalysts for H<sub>2</sub> generation via selective decomposition of hydrous hydrazine, *J. Catal.* 298(2013) 1–9.
4. K. Wang, Q. Yao, S. Qing, Z.H. Lu, La(OH)<sub>3</sub> nanosheet supported CoPt nanoparticles: a highly efficient and magnetically recyclable catalyst for hydrogen

- production from hydrazine in aqueous solution, *J. Mater. Chem. A* 7(2019) 9903–9911.
5. R. Jiang, X. Qu, F. Zeng, Q. Li, X. Zheng, Z. Xu, J. Peng, MOF-74-immobilized ternary Rh-Ni-P nanoparticles as highly efficient hydrous hydrazine dehydrogenation catalysts in alkaline solutions, *Int. J. Hydrogen Energy* 44(2019) 6383–6391.
  6. C. Wan, L. Sun, L. Xu, D.G. Cheng, F. Chen, X. Zhan, Y. Yang, Novel NiPt alloy nanoparticle decorated 2D layered g-C<sub>3</sub>N<sub>4</sub> nanosheets: a highly efficient catalyst for hydrogen generation from hydrous hydrazine, *J. Mater. Chem. A* 7(2019) 8798–8804.
  7. A. Kumar, X. Yang, Q. Xu, Ultrafine bimetallic Pt-Ni nanoparticles immobilized on 3-dimensional N-doped graphene networks: a highly efficient catalyst for dehydrogenation of hydrous hydrazine, *J. Mater. Chem. A* 7(2019) 112–115.
  8. P. Zhao, N. Cao, W. Luo, G. Cheng, Nanoscale MIL-101 supported RhNi nanoparticles: an efficient catalyst for hydrogen generation from hydrous hydrazine, *J. Mater. Chem. A* 3(2015) 12468–12475.
  9. H. Zou, Q. Yao, M. Huang, M. Zhu, F. Zhang, Z. H. Lu, Noble-metal-free NiFe nanoparticles immobilized on nano CeZrO<sub>2</sub> solid solutions for highly efficient hydrogen production from hydrous hydrazine, *Sustain. Energy Fuels* 3(2019) 3071–3077.
  10. Y.P. Qiu, G.X. Cao, H. Wen, Q. Shi, H. Dai, P. Wang, High-capacity hydrogen generation from hydrazine monohydrate using a noble-metal-free Ni<sub>10</sub>Mo/Ni-Mo-O nanocatalyst, *Int. J. Hydrogen Energy* 44(2019) 15110–15117.
  11. M.L. Huang, Q.L. Yao, G. Feng, H.T. Zou, Z.H. Lu, Nickel-ceria nanowires embedded in microporous silica: controllable synthesis, formation mechanism, and catalytic applications, *Inorg. Chem.* 59(2020) 5781–5790.
  12. X.L. Hong, Q.L. Yao, M.L. Huang, H.X. Du, Z.H. Lu, Bimetallic NiIr nanoparticles supported on lanthanum oxy-carbonate as highly efficient catalysts for hydrogen evolution from hydrazine borane and hydrazine, *Inorg. Chem. Front.* 6(2019) 2271–2278.
